# Supplementary material for: Pre-treatment serum albumin and mutational burden as biomarkers of response to immune checkpoint blockade
Source: PubMed Central journal article supplement (PMC8990074; doi:10.1038/s41698-022-00267-7), 2022-04-07
Supplement: 41698_2022_267_MOESM1_ESM.pdf [file 41698_2022_267_MOESM1_ESM.pdf]

**a**

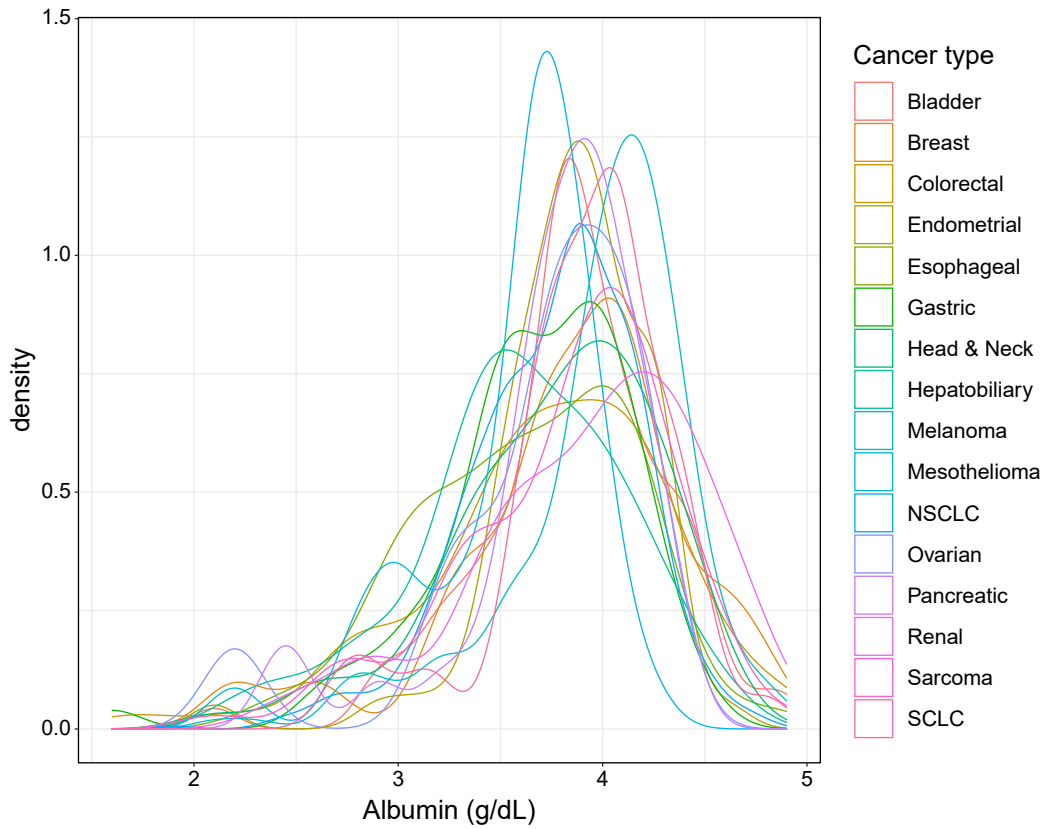

**b**

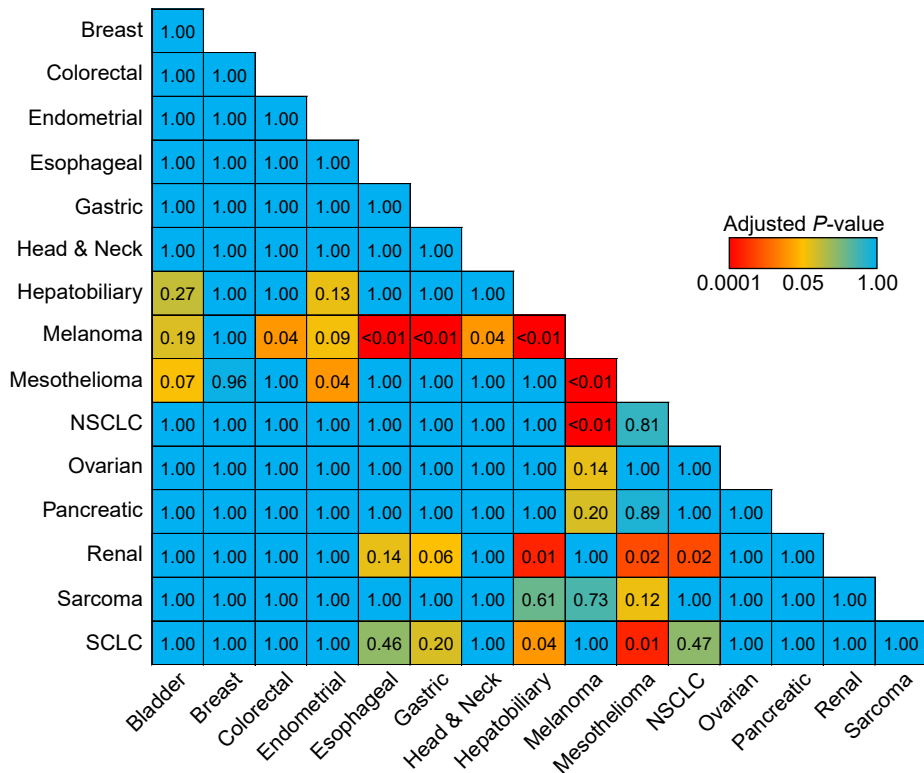

**Supplementary Fig. 1: Distribution of pre-treatment serum albumin level across 16 cancer types.** **a** Density plots show the distribution of serum albumin levels of each cancer type. **b** Pair-wise Mann-Whitney U test *P*-values among cancer types. *P*-values were corrected by the Bonferroni method. NSCLC and SCLC denote non-small cell lung cancer and small cell lung cancer, respectively.

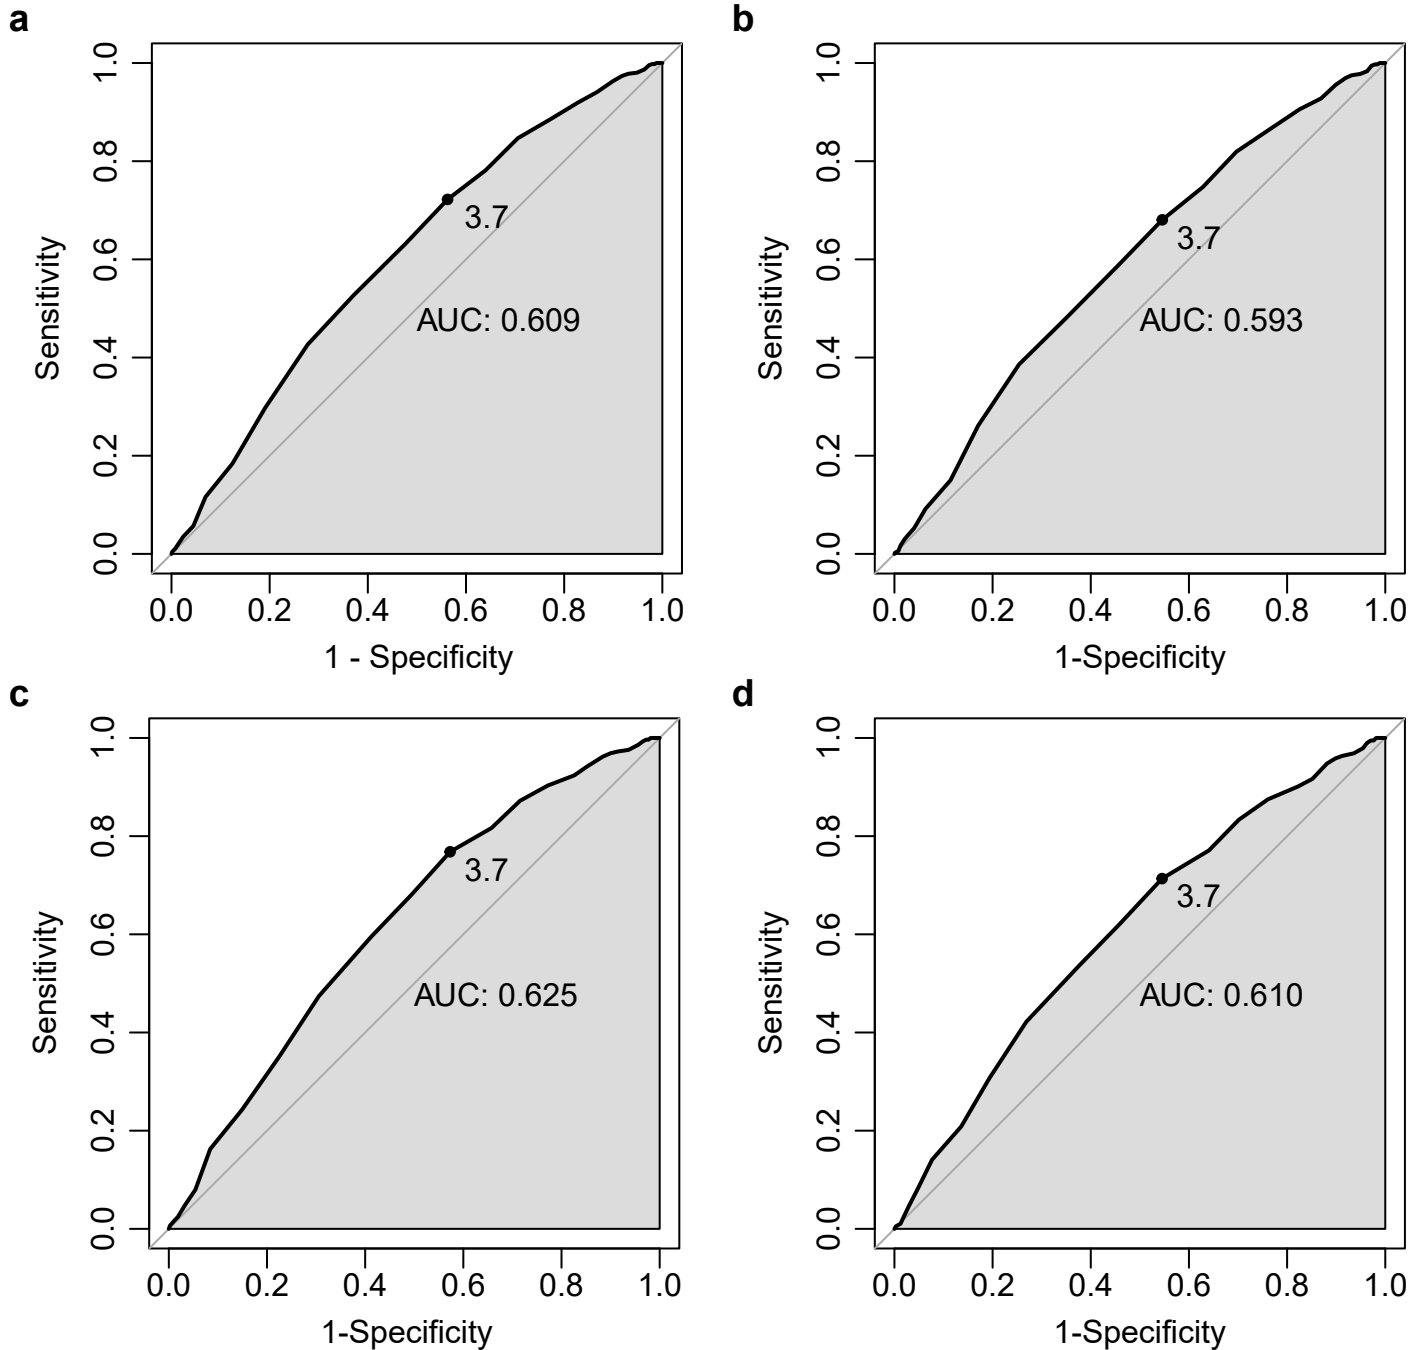

**Supplementary Fig. 2: Receiver operating characteristic curve analyses. Youden's index method determined the best cutoff value (>3.7 g/dL) from the curves. Analysis (a) with all patients, (b) excluding patients with melanoma, (c) excluding patients with non-small cell lung cancer (NSCLC), (d) excluding patients with melanoma or NSCLC. AUC denotes area under the curve.**

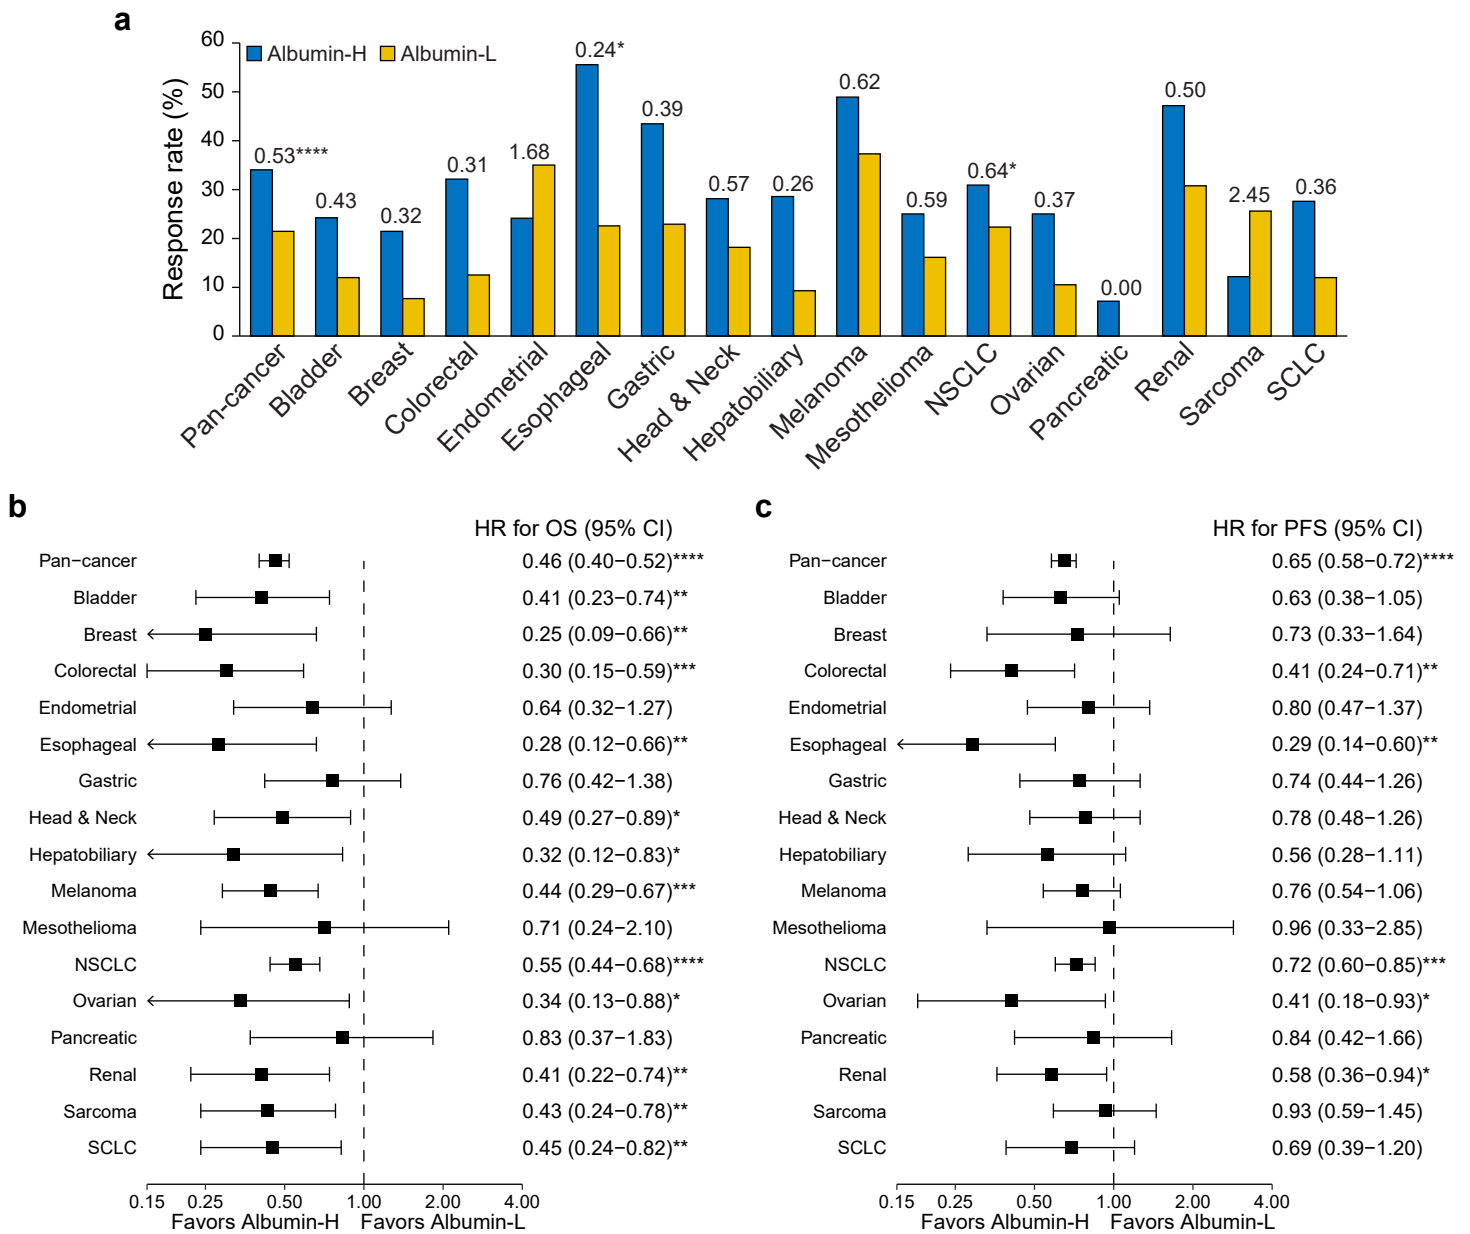

**Supplementary Fig. 3: Effect of albumin based on the 50th percentile cutoff (>3.9 g/dL).** **a** Response rate difference between the Albumin-H and Albumin-L groups. Odds ratios and  $\chi^2$  or Fisher's exact tests *P*-values for each comparison are presented. Forest plots show **(b)** overall survival (OS) and **(c)** progression-free survival (PFS) difference between two groups. All hazard ratios (HRs) and 95% confidence intervals (CIs) were calculated by univariable analysis. *P*-values were generated by the two-sided log-rank test. \*  $P \leq 0.05$  \*\*  $P \leq 0.01$  \*\*\*  $P \leq 0.001$  \*\*\*\*  $P \leq 0.0001$ .

**a**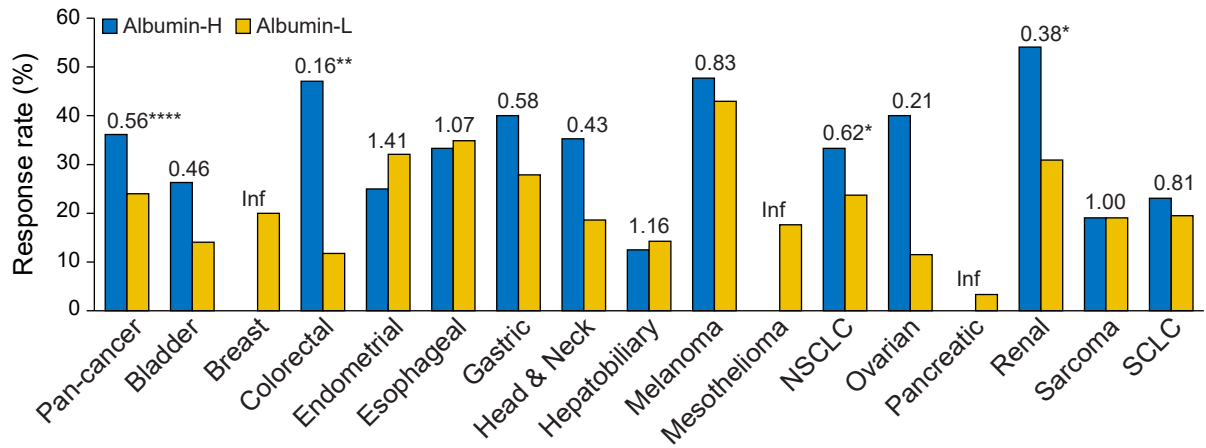**b**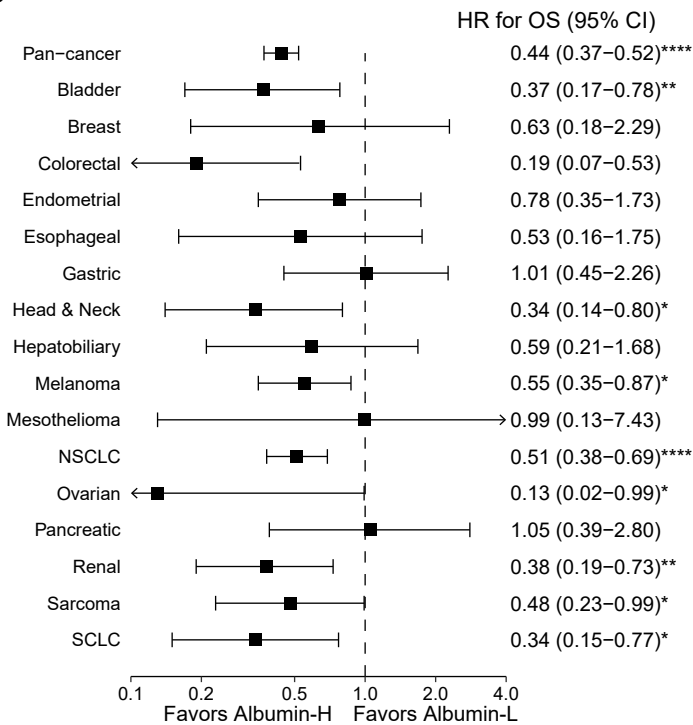**c**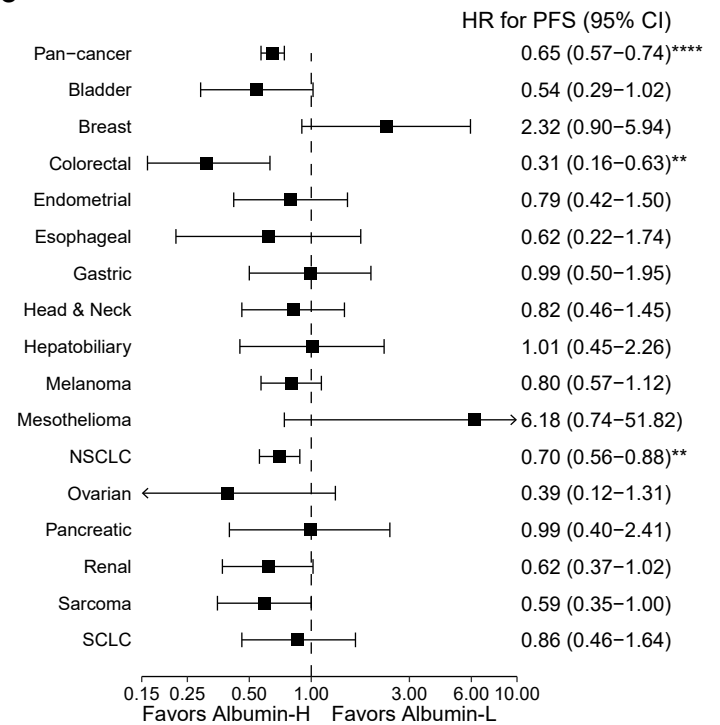

**Supplementary Fig. 4: Effect of albumin based on the 75th percentile cutoff (>4.1 g/dL).** a Response rate difference between the Albumin-H and Albumin-L groups. Odds ratios and  $\chi^2$  or Fisher's exact tests *P*-values for each comparison are presented. Forest plots show (b) OS and (c) PFS difference between two groups All HRs and 95% CIs were calculated by univariable analysis. *P*-values were generated by the two-sided log-rank test. \*  $P \leq 0.05$  \*\*  $P \leq 0.01$  \*\*\*  $P \leq 0.001$  \*\*\*\*  $P \leq 0.0001$ .

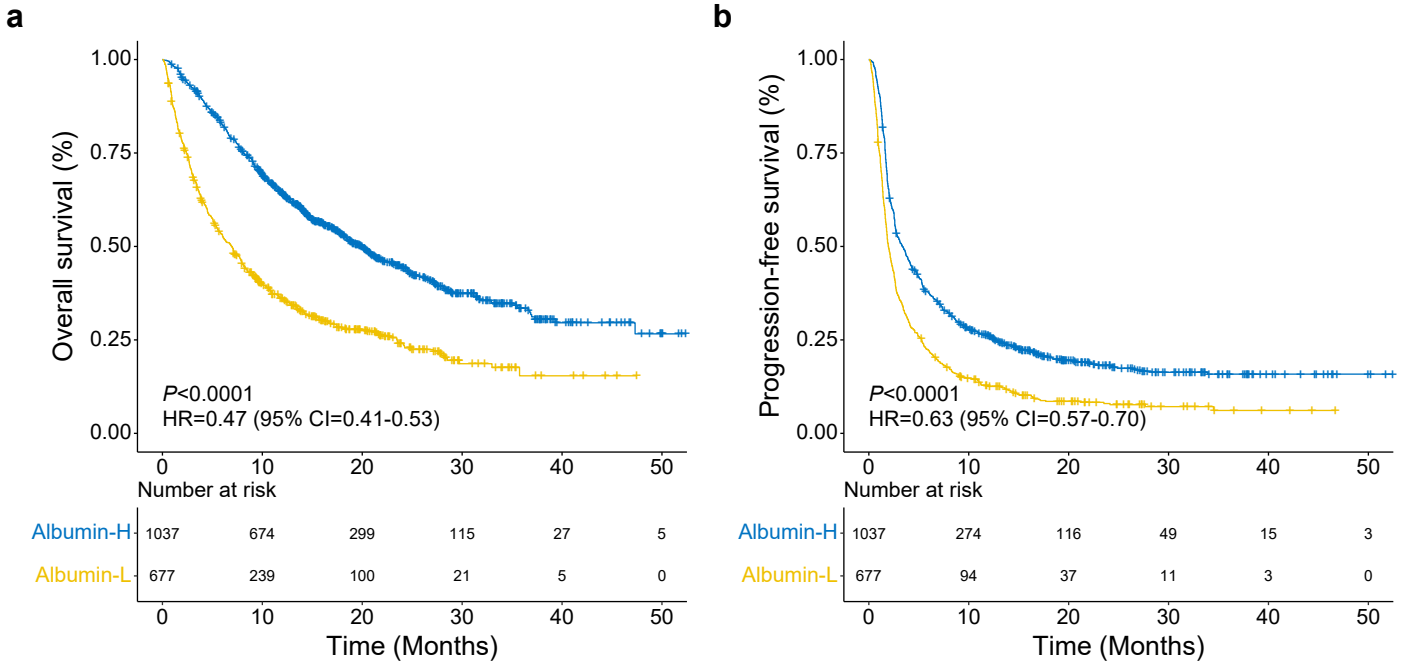

**Supplementary Fig. 5: Effect of serum albumin on the patient survival after immune checkpoint blockade therapy.** Kaplan-Meier plots show (a) OS and (b) PFS difference between two groups. The high albumin (Albumin-H) and low albumin (Albumin-L) groups were defined based on the optimal cutoff value ( $3.7 > \text{g/dL}$ ). All HRs and 95% CIs were calculated by univariable analysis. *P*-values were generated by the two-sided log-rank test.

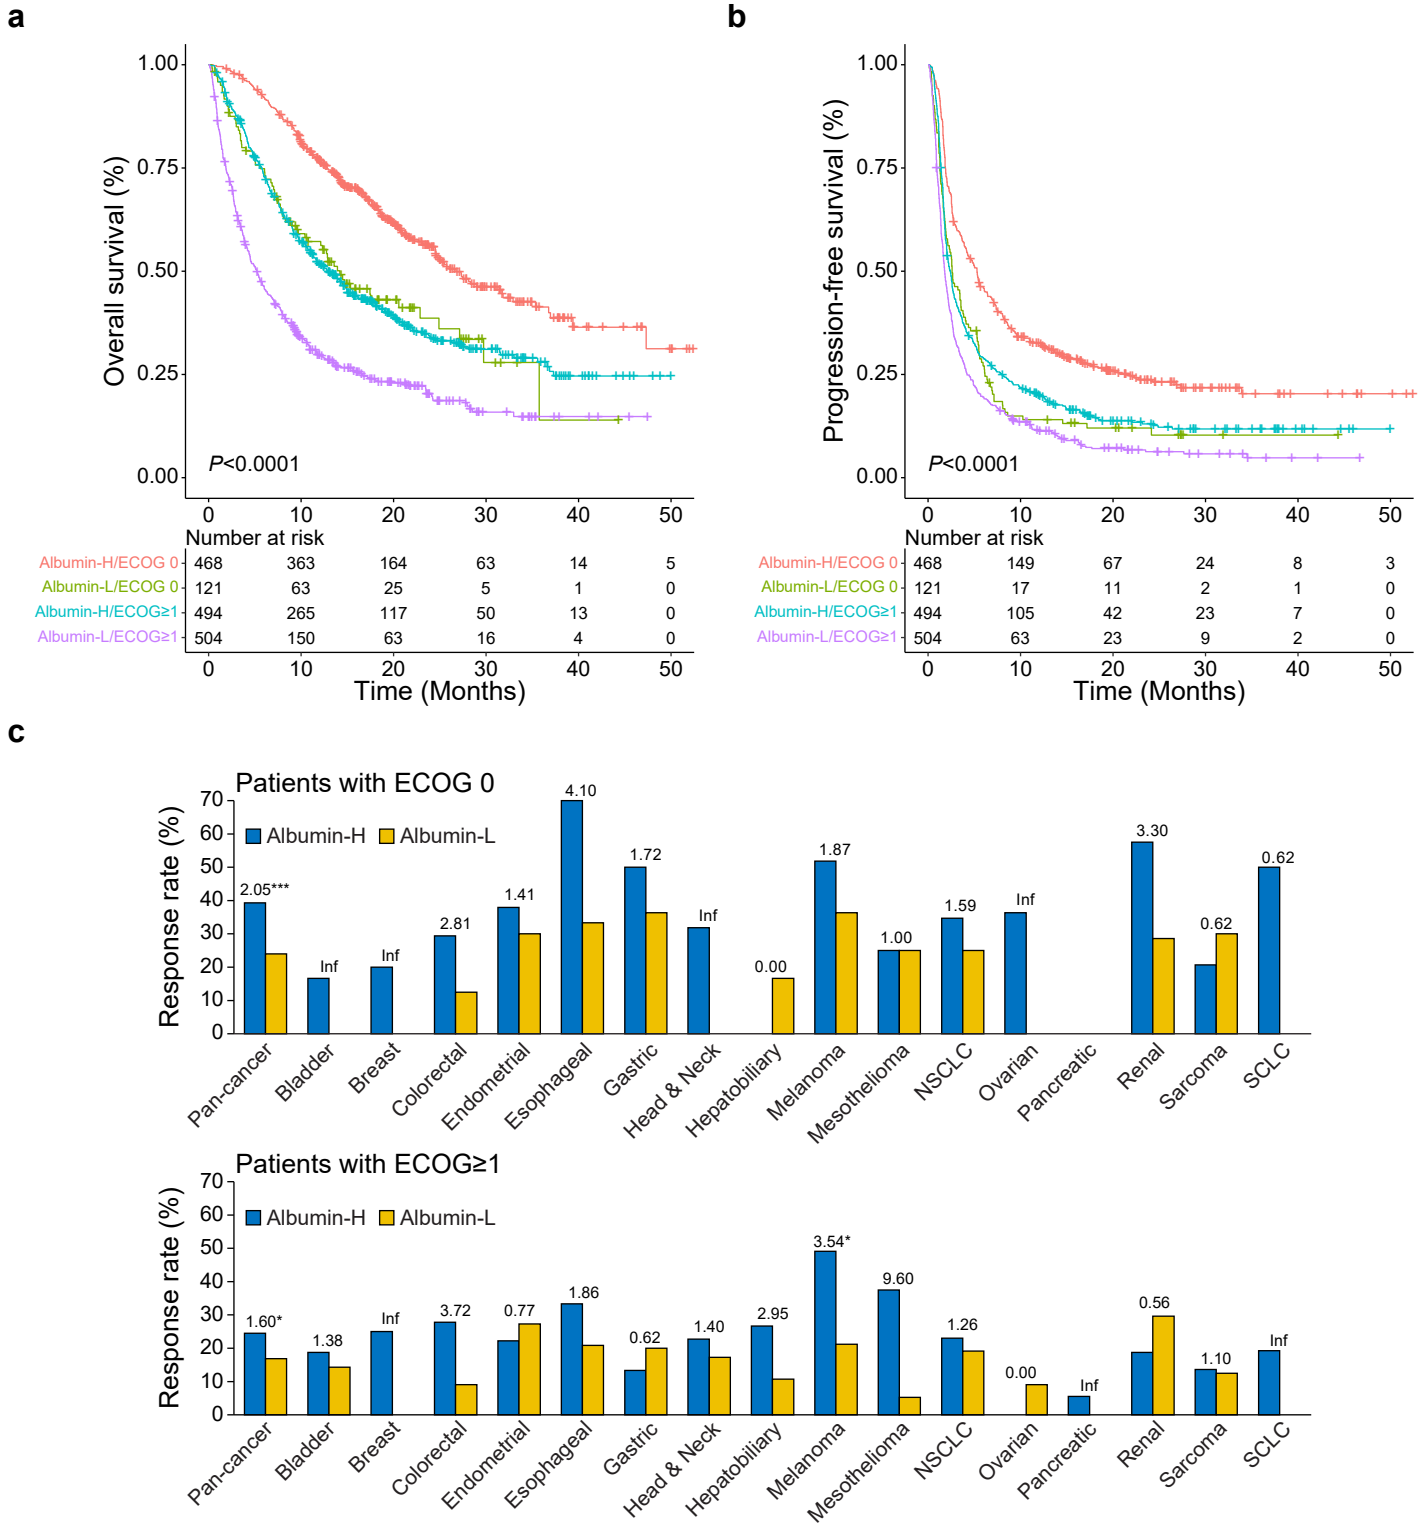

**Supplementary Fig. 6: Effect of albumin is independent of Eastern Cooperative Oncology Group (ECOG) performance status.** Kaplan-Meier plots showing the combined effects of serum albumin and ECOG performance status on (a) OS and (b) PFS. *P*-values were generated by the two-sided log-rank test. The Albumin-H and Albumin-L groups were defined based on the optimal cutoff value (3.7 > g/dL). c Radiographic response rate between the Albumin-H and Albumin-L groups according to the ECOG performance status. Odds ratios and  $\chi^2$  or Fisher's exact tests *P*-values for each comparison are presented. \*  $P \leq 0.05$  \*\*\*  $P \leq 0.001$ .

**a**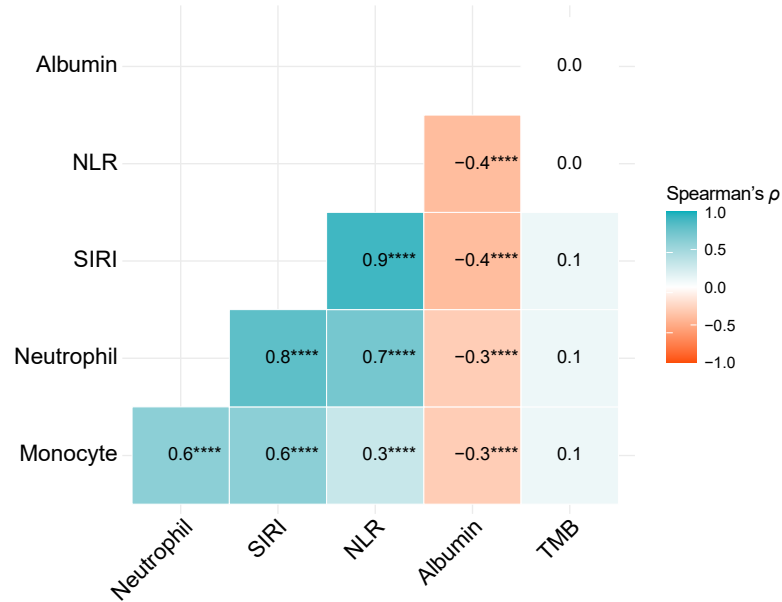**b**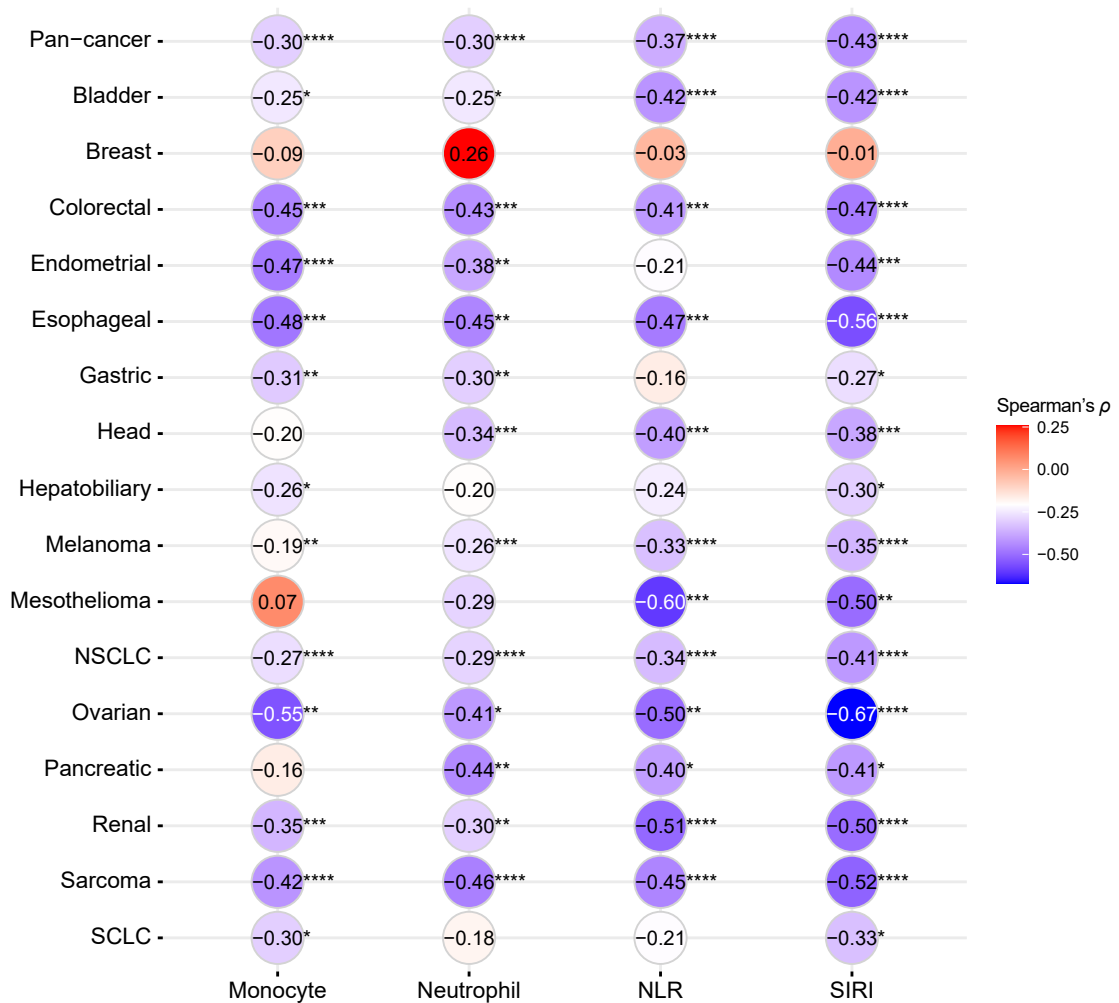

**Supplementary Fig. 7: Serum albumin reflects tumor inflammation status.** **a** Correlation matrix plot shows the correlation coefficient among serum albumin, TMB, and four inflammatory markers. NLR and SIRI denote neutrophil-to-lymphocyte ratio and systemic inflammation response index, respectively. **b** Balloon plot shows the correlation coefficient between serum albumin and four inflammatory markers across cancer types. \*  $P \leq 0.05$  \*\*  $P \leq 0.01$  \*\*\*  $P \leq 0.001$  \*\*\*\*  $P \leq 0.0001$ .

**Supplementary Table 1 Characteristics of patients with ICB treatment.**

| <b>Characteristics</b>   | <b>No. patients (%)</b> |
|--------------------------|-------------------------|
| Sex                      |                         |
| Female                   | 788 (46.0)              |
| Male                     | 926 (54.0)              |
| Age, median, years (IQR) | 64 (55-71)              |
| Cancer type              |                         |
| NSCLC                    | 666 (38.9)              |
| Melanoma                 | 216 (12.6)              |
| Renal                    | 92 (5.4)                |
| Sarcoma                  | 84 (4.9)                |
| Bladder                  | 83 (4.8)                |
| Head & Neck              | 76 (4.4)                |
| Gastric                  | 71 (4.1)                |
| Endometrial              | 70 (4.1)                |
| Colorectal               | 68 (4.0)                |
| Hepatobiliary            | 57 (3.3)                |
| SCLC                     | 54 (3.2)                |
| Esophageal               | 49 (2.9)                |
| Pancreatic               | 36 (2.1)                |
| Mesothelioma             | 35 (2.0)                |
| Ovarian                  | 30 (1.8)                |
| Breast                   | 27 (1.6)                |
| Drug class               |                         |
| PD-1/PD-L1               | 1,422 (83.0)            |
| CTLA-4                   | 7 (0.4)                 |
| Combo                    | 285 (16.6)              |
| ICB line of treatment    |                         |
| First line               | 522 (30.5)              |
| Subsequent line          | 1192 (69.5)             |
| Stage                    |                         |
| I-III                    | 105 (6.1)               |
| IV                       | 1,577 (92.0)            |
| Unknown                  | 32 (1.9)                |
| Performance status       |                         |
| ECOG 0                   | 589 (34.4)              |
| ECOG ≥1                  | 998 (58.2)              |
| Unknown                  | 127 (7.4)               |

Abbreviations: NSCLC, Non-small cell lung cancer; SCLC, small cell lung cancer; PD-1, programmed cell death 1; PD-L1, programmed cell death ligand 1; CTLA-4, cytotoxic T-lymphocyte antigen 4; Combo, combination of anti-PD-1/PD-L1 and anti-CTLA-4; ICB, immune checkpoint blockade; ECOG, Eastern Cooperative Oncology Group



**Supplementary Table 2 Comparison of the effect of high serum albumin (3.7 g/dL) on survival according to the drug class.**

| Cancer type   | Overall survival |         |                      |         | Progression-free survival |         |                      |         |
|---------------|------------------|---------|----------------------|---------|---------------------------|---------|----------------------|---------|
|               | Combo            |         | PD-1/PD-L1 or CTLA-4 |         | Combo                     |         | PD-1/PD-L1 or CTLA-4 |         |
|               | HR (95% CI)      | P-value | HR (95% CI)          | P-value | HR (95% CI)               | P-value | HR (95% CI)          | P-value |
| Pan-cancer    | 0.36 (0.26-0.5)  | <0.0001 | 0.49 (0.43-0.56)     | <0.0001 | 0.53 (0.40-0.69)          | <0.0001 | 1.55 (1.73-1.38)     | <0.0001 |
| Bladder       | NA               | NA      | 0.58 (0.33-1.02)     | 0.06    | NA                        | NA      | 0.99 (0.59-1.67)     | 0.98    |
| Breast        | NA               | NA      | 0.23 (0.09-0.63)     | 0.004   | NA                        | NA      | 0.45 (0.19-1.05)     | 0.07    |
| Colorectal    | 0.46 (0.08-2.58) | 0.38    | 0.37 (0.19-0.73)     | 0.004   | 0.29 (0.07-1.27)          | 0.10    | 0.58 (0.33-1.03)     | 0.06    |
| Endometrial   | 0.64 (0.09-4.62) | 0.66    | 0.59 (0.28-1.25)     | 0.17    | 3.93 (0.42-36.69)         | 0.23    | 0.53 (0.29-0.95)     | 0.03    |
| Esophageal    | NA               | NA      | 0.35 (0.16-0.79)     | 0.01    | NA                        | NA      | 0.41 (0.21-0.81)     | 0.01    |
| Gastric       | 0.31 (0.09-1.04) | 0.06    | 1.09 (0.56-2.12)     | 0.8     | 0.49 (0.18-1.38)          | 0.18    | 1.03 (0.58-1.84)     | 0.92    |
| Head & Neck   | NA               | NA      | 0.49 (0.28-0.87)     | 0.01    | NA                        | NA      | 0.65 (0.40-1.05)     | 0.08    |
| Hepatobiliary | NA               | NA      | 0.34 (0.16-0.73)     | 0.006   | NA                        | NA      | 0.58 (0.32-1.05)     | 0.07    |
| Melanoma      | 0.35 (0.17-0.72) | 0.004   | 0.33 (0.19-0.59)     | 0.0002  | 0.72 (0.40-1.30)          | 0.27    | 0.48 (0.30-0.79)     | 0.004   |
| Mesothelioma  | 1.22 (0.20-7.39) | 0.83    | 0.44 (0.16-1.22)     | 0.11    | 0.76 (0.12-4.61)          | 0.76    | 0.72 (0.32-1.64)     | 0.44    |
| NSCLC         | 0.38 (0.21-0.71) | 0.002   | 0.56 (0.45-0.68)     | <0.0001 | 0.59 (0.35-1.01)          | 0.05    | 0.70 (0.59-0.83)     | <0.0001 |
| Ovarian       | NA               | NA      | 0.32 (0.13-0.79)     | 0.01    | NA                        | NA      | 0.32 (0.14-0.75)     | 0.008   |
| Pancreatic    | 0.29 (0.02-4.65) | 0.38    | 1.45 (0.56-3.75)     | 0.44    | 0.29 (0.02-4.65)          | 0.38    | 1.01 (0.48-2.12)     | 0.97    |
| Renal         | 0.40 (0.04-3.85) | 0.43    | 0.48 (0.26-0.90)     | 0.02    | 0.44 (0.05-3.94)          | 0.46    | 0.62 (0.37-1.03)     | 0.06    |
| Sarcoma       | 0.19 (0.04-0.87) | 0.03    | 0.46 (0.25-0.86)     | 0.02    | 0.73 (0.25-2.20)          | 0.58    | 0.78 (0.46-1.31)     | 0.35    |
| SCLC          | 0.34 (0.14-0.82) | 0.02    | 0.44 (0.16-1.25)     | 0.13    | 0.28 (0.12-0.65)          | 0.003   | 0.82 (0.30-2.19)     | 0.69    |

Abbreviations: Combo, combination of anti-PD-1/PD-L1 and anti-CTLA-4; HR, hazard ratio; CI, confidence interval; NA, not applicable; NSCLC, Non-small cell lung cancer; SCLC, small cell lung cancer

**Supplementary Table 3 Comparison of the effect of high serum albumin (3.7 g/dL) on survival according to the age groups.**

| Cancer type   | Overall survival    |         |                     |         | Progression-free survival |          |                     |         |
|---------------|---------------------|---------|---------------------|---------|---------------------------|----------|---------------------|---------|
|               | Age>64 <sup>a</sup> |         | Age≤64 <sup>a</sup> |         | Age>64 <sup>a</sup>       |          | Age≤64 <sup>a</sup> |         |
|               | HR (95% CI)         | P-value | HR (95% CI)         | P-value | HR (95% CI)               | P-value  | HR (95% CI)         | P-value |
| Pan-cancer    | 0.51 (0.43-0.61)    | <0.0001 | 0.42 (0.35-0.50)    | <0.0001 | 0.63 (0.54-0.73)          | 9.48E-10 | 0.61 (0.52-0.70)    | <0.0001 |
| Bladder       | 0.63 (0.30-1.30)    | 0.21    | 0.34 (0.15-0.82)    | 0.21    | 0.72 (0.37-1.41)          | 0.34     | 0.85 (1.91-0.38)    | 0.69    |
| Breast        | NA                  | NA      | 0.28 (0.10-0.77)    | 0.01    | NA                        | NA       | 0.49 (1.18-0.20)    | 0.11    |
| Colorectal    | 0.27 (0.03-2.26)    | 0.23    | 0.34 (0.17-0.67)    | 0.002   | 1.06 (0.27-4.15)          | 0.94     | 0.37 (0.67-0.21)    | 0.0009  |
| Endometrial   | 0.43 (0.19-0.97)    | 0.04    | 1.05 (0.28-3.97)    | 0.95    | 0.73 (0.37-1.45)          | 0.37     | 0.42 (1.10-0.16)    | 0.08    |
| Esophageal    | 0.43 (0.10-1.96)    | 0.28    | 0.27 (0.10-0.71)    | 0.008   | 0.32 (0.09-1.14)          | 0.08     | 0.42 (1.02-0.17)    | 0.05    |
| Gastric       | 1.05 (0.42-2.63)    | 0.92    | 0.69 (0.34-1.41)    | 0.31    | 0.74 (0.33-1.65)          | 0.46     | 0.80 (1.51-0.42)    | 0.48    |
| Head & Neck   | 0.36 (0.13-0.94)    | 0.04    | 0.62 (0.30-1.29)    | 0.20    | 0.67 (0.31-1.48)          | 0.32     | 0.64 (1.18-0.34)    | 0.15    |
| Hepatobiliary | 0.22 (0.05-1.02)    | 0.05    | 0.34 (0.13-0.86)    | 0.02    | 0.70 (0.28-1.74)          | 0.44     | 0.52 (1.18-0.23)    | 0.12    |
| Melanoma      | 0.42 (0.23-0.76)    | 0.004   | 0.27 (0.14-0.53)    | 0.0002  | 0.61 (0.37-1.01)          | 0.06     | 0.49 (0.86-0.27)    | 0.013   |
| Mesothelioma  | 0.45 (0.16-1.28)    | 0.14    | 0.80 (0.18-3.67)    | 0.78    | 0.45 (0.17-1.15)          | 0.09     | 0.87 (3.96-0.19)    | 0.86    |
| NSCLC         | 0.59 (0.46-0.76)    | <0.0001 | 0.47 (0.35-0.64)    | <0.0001 | 0.69 (0.55-0.85)          | 0.0006   | 0.69 (0.90-0.53)    | 0.006   |
| Ovarian       | 0.39 (0.10-1.59)    | 0.19    | 0.16 (0.04-0.56)    | 0.004   | 0.55 (0.18-1.69)          | 0.30     | 0.16 (0.63-0.04)    | 0.008   |
| Pancreatic    | 1.10 (0.28-4.39)    | 0.89    | 1.79 (0.58-5.57)    | 0.32    | 0.66 (0.20-2.17)          | 0.49     | 0.94 (2.27-0.39)    | 0.90    |
| Renal         | 0.30 (0.07-1.35)    | 0.12    | 0.48 (0.25-0.91)    | 0.03    | 0.35 (0.10-1.20)          | 0.10     | 0.65 (1.11-0.38)    | 0.11    |
| Sarcoma       | 0.36 (0.14-0.91)    | 0.03    | 0.38 (0.18-0.79)    | 0.009   | 0.67 (0.32-1.44)          | 0.31     | 0.75 (1.37-0.41)    | 0.35    |
| SCLC          | 0.25 (0.11-0.58)    | 0.001   | 0.53 (0.14-1.96)    | 0.34    | 0.24 (0.10-0.56)          | 0.0009   | 0.91 (2.76-0.30)    | 0.87    |

Abbreviations: HR, hazard ratio; CI, confidence interval; NA, not applicable; NSCLC, Non-small cell lung cancer; SCLC, small cell lung cancer; <sup>a</sup>Age groups were divided based on the median age of the cohort

**Supplementary Table 4 Comparison of the effect of high serum albumin (3.7 g/dL) on survival according to the sex.**

| Cancer type   | Overall survival |         |                   |         | Progression-free survival |         |                   |         |
|---------------|------------------|---------|-------------------|---------|---------------------------|---------|-------------------|---------|
|               | Male             |         | Female            |         | Male                      |         | Female            |         |
|               | HR (95% CI)      | P-value | HR (95% CI)       | P-value | HR (95% CI)               | P-value | HR (95% CI)       | P-value |
| Pan-cancer    | 0.47 (0.39-0.55) | <0.0001 | 0.46 (0.39-0.55)  | <0.0001 | 0.65 (0.56-0.75)          | <0.0001 | 0.60 (0.51-0.70)  | <0.0001 |
| Bladder       | 0.54 (0.28-1.04) | 0.06    | 0.42 (0.15-1.20)  | 0.11    | 0.94 (0.52-1.71)          | 0.83    | 0.62 (0.23-1.63)  | 0.33    |
| Breast        | NA               | NA      | 0.23 (0.09-0.60)  | 0.003   | NA                        | NA      | 0.47 (0.21-1.08)  | 0.08    |
| Colorectal    | 0.31 (0.10-0.94) | 0.04    | 0.50 (0.23-1.09)  | 0.08    | 0.57 (0.24-1.35)          | 0.20    | 0.63 (0.31-1.26)  | 0.19    |
| Endometrial   | NA               | NA      | 0.58 (0.29-1.15)  | 0.12    | NA                        | NA      | 0.59 (0.34-1.04)  | 0.07    |
| Esophageal    | 0.25 (0.10-0.61) | 0.002   | 0.95 (0.19-4.77)  | 0.95    | 0.33 (0.15-0.71)          | 0.005   | 0.67 (0.18-2.55)  | 0.56    |
| Gastric       | 0.55 (0.28-1.10) | 0.09    | 1.45 (0.50-4.19)  | 0.49    | 0.79 (0.44-1.43)          | 0.43    | 0.88 (0.35-2.20)  | 0.78    |
| Head & Neck   | 0.58 (0.30-1.10) | 0.1     | 0.41 (0.1-0.64)   | 0.21    | 0.74 (0.43-1.29)          | 0.29    | 0.46 (0.15-1.39)  | 0.17    |
| Hepatobiliary | 0.43 (0.16-1.15) | 0.09    | 0.24 (0.07-0.87)  | 0.03    | 0.89 (0.41-1.93)          | 0.78    | 0.49 (0.20-1.19)  | 0.12    |
| Melanoma      | 0.35 (0.20-0.62) | 0.0003  | 0.20 (0.09-0.43)  | <0.0001 | 0.56 (0.36-0.88)          | 0.01    | 0.54 (0.26-1.12)  | 0.10    |
| Mesothelioma  | 0.45 (0.18-1.14) | 0.09    | 3.46 (0.22-55.78) | 0.38    | 0.54 (0.23-1.26)          | 0.15    | 1.42 (0.13-16.04) | 0.78    |
| NSCLC         | 0.53 (0.40-0.70) | <0.0001 | 0.54 (0.41-0.71)  | <0.0001 | 0.71 (0.56-0.89)          | 0.004   | 0.68 (0.54-0.85)  | 0.001   |
| Ovarian       | NA               | NA      | 0.30 (0.13-0.73)  | 0.007   | NA                        | NA      | 0.35 (0.16-0.77)  | 0.01    |
| Pancreatic    | 1.17 (0.36-3.75) | 0.79    | 1.28 (0.33-4.97)  | 0.72    | 0.58 (0.23-1.48)          | 0.25    | 1.11 (0.36-3.45)  | 0.86    |
| Renal         | 0.38 (0.19-0.79) | 0.009   | 0.42 (0.14-1.26)  | 0.12    | 0.63 (0.34-1.16)          | 0.14    | 0.39 (0.17-0.92)  | 0.03    |
| Sarcoma       | 0.62 (0.27-1.43) | 0.26    | 0.03 (0.01-0.12)  | <0.0001 | 0.96 (0.51-1.80)          | 0.91    | 0.36 (0.17-0.75)  | 0.007   |
| SCLC          | 0.38 (0.16-0.90) | 0.03    | 0.39 (0.13-1.13)  | 0.08    | 0.45 (0.20-1.03)          | 0.06    | 0.35 (0.12-1.03)  | 0.06    |

Abbreviations: HR, hazard ratio; CI, confidence interval; NA, not applicable; NSCLC, Non-small cell lung cancer; SCLC, small cell lung cancer

**Supplementary Table 5 Comparison of the effect of high serum albumin (3.7 g/dL) on survival according to the TMB groups.**

| Cancer type   | Overall survival |         |                  |         | Progression-free survival |         |                  |         |
|---------------|------------------|---------|------------------|---------|---------------------------|---------|------------------|---------|
|               | TMB $\geq$ 10    |         | TMB<10           |         | TMB $\geq$ 10             |         | TMB<10           |         |
|               | HR (95% CI)      | P-value | HR (95% CI)      | P-value | HR (95% CI)               | P-value | HR (95% CI)      | P-value |
| Pan-cancer    | 0.48 (0.37-0.62) | <0.0001 | 0.46 (0.40-0.53) | <0.0001 | 0.55 (0.44-0.68)          | <0.0001 | 0.67 (0.60-0.76) | <0.0001 |
| Bladder       | 0.49 (0.16-1.56) | 0.23    | 0.47 (0.25-0.90) | 0.02    | 0.75 (0.28-2.00)          | 0.56    | 0.96 (0.53-1.75) | 0.9     |
| Breast        | NA               | NA      | 0.22 (0.08-0.59) | 0.003   | NA                        | NA      | 0.49 (0.21-1.14) | 0.1     |
| Colorectal    | 0.22 (0.06-0.83) | 0.02    | 0.39 (0.19-0.81) | 0.01    | 0.34 (0.12-0.99)          | 0.048   | 0.41 (0.21-0.78) | 0.007   |
| Endometrial   | 0.29 (0.07-1.33) | 0.11    | 0.68 (0.30-1.53) | 0.35    | 0.39 (0.14-1.10)          | 0.08    | 0.65 (0.33-1.28) | 0.21    |
| Esophageal    | NA               | NA      | 0.39 (0.18-0.84) | 0.02    | NA                        | NA      | 0.38 (0.19-0.78) | 0.008   |
| Gastric       | NA               | NA      | 1.01 (0.56-1.82) | 0.98    | NA                        | NA      | 0.96 (0.57-1.62) | 0.89    |
| Head & Neck   | 0.36 (0.08-1.57) | 0.17    | 0.58 (0.31-1.08) | 0.09    | 0.89 (0.27-2.98)          | 0.85    | 0.60 (0.36-1.03) | 0.06    |
| Hepatobiliary | 2.21 (0.2-24.47) | 0.52    | 0.25 (0.10-0.58) | 0.001   | 3.49 (0.57-21.55)         | 0.18    | 0.53 (0.28-0.99) | 0.04    |
| Melanoma      | 0.26 (0.13-0.51) | <0.0001 | 0.42 (0.23-0.79) | 0.007   | 0.43 (0.25-0.75)          | 0.003   | 0.77 (0.46-1.30) | 0.33    |
| Mesothelioma  | NA               | NA      | 0.57 (0.24-1.34) | 0.19    | NA                        | NA      | 0.74 (0.36-1.55) | 0.43    |
| NSCLC         | 0.70 (0.48-1.01) | 0.06    | 0.48 (0.38-0.60) | <0.0001 | 0.61 (0.45-0.83)          | 0.002   | 0.74 (0.61-0.90) | 0.002   |
| Ovarian       | NA               | NA      | 0.34 (0.14-0.82) | 0.02    | NA                        | NA      | 0.44 (0.20-0.98) | 0.04    |
| Pancreatic    | NA               | NA      | 1.47 (0.58-3.72) | 0.41    | NA                        | NA      | 0.79 (0.39-1.63) | 0.53    |
| Renal         | NA               | NA      | 0.41 (0.22-0.74) | 0.003   | NA                        | NA      | 0.54 (0.33-0.88) | 0.01    |
| Sarcoma       | NA               | NA      | 0.29 (0.16-0.53) | <0.0001 | NA                        | NA      | 0.62 (0.38-1.00) | 0.048   |
| SCLC          | 0.52 (0.19-1.45) | 0.21    | 0.25 (0.09-0.66) | 0.005   | 0.49 (0.18-1.32)          | 0.16    | 0.24 (0.09-0.62) | 0.003   |

Abbreviations: HR, hazard ratio; CI, confidence interval; NA, not applicable; NSCLC, Non-small cell lung cancer; SCLC, small cell lung cancer

**Supplementary Table 6 Characteristics of patients without ICB treatment.**

| <b>Characteristics</b>                   | <b>No. patients (%)</b> |
|------------------------------------------|-------------------------|
| Sex                                      |                         |
| Female                                   | 3,212 (39.8)            |
| Male                                     | 2,123 (60.2)            |
| Age at diagnosis,<br>median, years (IQR) | 61 (51-70)              |
| Cancer type                              |                         |
| NSCLC                                    | 1,087 (20.4)            |
| Colorectal                               | 1,050 (19.7)            |
| Pancreatic                               | 719 (13.5)              |
| Breast                                   | 693 (13.0)              |
| Sarcoma                                  | 493 (9.2)               |
| Hepatobiliary                            | 281 (5.3)               |
| Ovarian                                  | 243 (4.6)               |
| Endometrial                              | 219 (4.1)               |
| Gastric                                  | 147 (2.8)               |
| Renal                                    | 87 (1.6)                |
| Head & Neck                              | 75 (1.4)                |
| Bladder                                  | 72 (1.3)                |
| Esophageal                               | 69 (1.3)                |
| SCLC                                     | 59 (1.1)                |
| Melanoma                                 | 41 (0.8)                |
| Stage at diagnosis                       |                         |
| I-III                                    | 2,752 (51.6)            |
| IV                                       | 2,470 (46.3)            |
| Unknown                                  | 113 (2.1)               |

Abbreviations: NSCLC, Non-small cell lung cancer; SCLC, small cell lung cancer

**Supplementary Table 7 Comparison of the effect of high serum albumin (3.7 g/dL) on overall survival according to the treatment context.**

| Cancer type   | Without/before ICB treatment |                 | ICB treatment    |                 |
|---------------|------------------------------|-----------------|------------------|-----------------|
|               | HR (95% CI)                  | <i>P</i> -value | HR (95% CI)      | <i>P</i> -value |
| Pan-cancer    | 0.37 (0.33-0.41)             | <0.0001         | 0.47 (0.41-0.53) | <0.0001         |
| Bladder       | 0.20 (0.06-0.68)             | 0.01            | 0.50 (0.28-0.86) | 0.01            |
| Breast        | 0.58 (0.21-1.59)             | 0.29            | 0.22 (0.08-0.57) | 0.002           |
| Colorectal    | 0.34 (0.26-0.45)             | <0.0001         | 0.37 (0.20-0.68) | 0.002           |
| Endometrial   | 0.28 (0.14-0.56)             | 0.0003          | 0.58 (0.29-1.15) | 0.12            |
| Esophageal    | 0.69 (0.28-1.67)             | 0.41            | 0.35 (0.16-0.75) | 0.007           |
| Gastric       | 0.72 (0.39-1.30)             | 0.27            | 0.82 (0.47-1.43) | 0.48            |
| Head & Neck   | 0.43 (0.06-3.29)             | 0.42            | 0.53 (0.30-0.93) | 0.03            |
| Hepatobiliary | 0.55 (0.40-0.75)             | 0.0002          | 0.34 (0.16-0.74) | 0.006           |
| Melanoma      | 0.28 (0.03-3.05)             | 0.29            | 0.34 (0.22-0.53) | <0.0001         |
| NSCLC         | 0.24 (0.19-0.30)             | <0.0001         | 0.54 (0.44-0.65) | <0.0001         |
| Ovarian       | 0.77 (0.43-1.38)             | 0.37            | 0.30 (0.13-0.72) | 0.007           |
| Pancreatic    | 0.70 (0.56-0.87)             | 0.002           | 1.37 (0.58-3.23) | 0.47            |
| Renal         | 0.08 (0.03-0.19)             | <0.0001         | 0.41 (0.22-0.74) | 0.003           |
| Sarcoma       | 0.39 (0.27-0.55)             | <0.0001         | 0.37 (0.21-0.67) | 0.0008          |
| SCLC          | 0.64 (0.32-1.30)             | 0.22            | 0.36 (0.18-0.69) | 0.003           |

Abbreviations: ICB, immune checkpoint blockade; HR, hazard ratio; CI, confidence interval; NSCLC, Non-small cell lung cancer; SCLC, small cell lung cancer
